# Supplementary material for: Retinoic acid and meiosis induction in adult versus embryonic gonads of medaka
Source: PubMed Central journal article supplement (PMC5039705; doi:10.1038/srep34281), 2016-09-28
Supplement: srep34281-s1.pdf [file srep34281-s1.pdf]

# Supplementary information

## Retinoic Acid and Meiosis Induction in Adult versus Embryonic Gonads of Medaka

Mateus C. Adolphi<sup>1</sup>, Amaury Herpin<sup>1,2</sup>, Martina Regensburger<sup>1</sup>, Jacopo Sacquegno<sup>1</sup>, Joshua S. Waxman<sup>3</sup> and Manfred Scharl<sup>1,4</sup>

1 -University of Wuerzburg, Physiological Chemistry, Biocenter, Am Hubland, D-97074 Wuerzburg, Germany.

2 - INRA, UR1037, Fish Physiology and Genomics, Rennes F-35000, France.

3 - The Heart Institute, Molecular Cardiovascular Biology and Developmental Biology Divisions, Cincinnati Children's Hospital Medical Center, Cincinnati, Ohio, USA.

4- Comprehensive Cancer Center Mainfranken, University Clinic Würzburg, Josef Schneider Straße 6, 97074 Wuerzburg, Germany and Texas Institute for Advanced Study and Department of Biology, Texas A&M University, College Station, Texas 77843, USA

**SUPPLEMENTARY TABLE**

| <b>Primer</b>   | <b>Sequence</b>                 | <b>Purpose</b>                     |
|-----------------|---------------------------------|------------------------------------|
| Aldh1a2_RT_F    | 5'-GCCTTCTCTTTGGGCTCAGT-3'      | qRT-PCR                            |
| Aldh1a2_RT_R    | 5'-GGAAATGCGGTGTAGTGGTC-3'      | qRT-PCR                            |
| Cyp26a1_RT_F    | 5'-AGAGATGAAGCGGCTGATGT-3'      | qRT-PCR                            |
| Cyp26a1_RT_R    | 5'-TCTTCTTGCTGCTGTCGATG-3'      | qRT-PCR                            |
| Cyp26b1_RT_F    | 5'-ATCCGAGCACGAGACATCTT-3'      | qRT-PCR                            |
| Cyp26b1_RT_R    | 5'-GGATGTTGGAGGAGTTGCAT-3'      | qRT-PCR                            |
| Cyp26c1_RT_F    | 5'-CAGAGGGGCTTGACTTTGAC-3'      | qRT-PCR                            |
| Cyp26c1_RT_R    | 5'-CAGCCTTTGGGAATCTGGTA-3'      | qRT-PCR                            |
| Dmc1-RT-F       | 5'-GTTTCCAGACGGCCTTTGAG-3'      | qRT-PCR                            |
| Dmc1-RT-R       | 5'-CGATGTCTCTCAGCCTGTCT-3'      | qRT-PCR                            |
| Efla-RT-F       | 5'-GCCCCTGGACACAGAGACTTCATCA-3' | qRT-PCR                            |
| Efla-RT-R       | 5'-AAGGGGGCTCGGTGGAGTCCAT-3'    | qRT-PCR                            |
| Aldh1a2_Probe_F | 5'-CAGAGTGGAATCCAGGAAGG-3'      | <i>in situ</i> hybridization probe |
| Aldh1a2_Probe_R | 5'-GGAAATGCGGTGTAGTGGTC-3'      | <i>in situ</i> hybridization probe |
| Cyp26a1_Probe_F | 5'-CTTTCAGCTCAATGGCTTCC-3'      | <i>in situ</i> hybridization probe |
| Cyp26a1_Probe_R | 5'-CAAACGTCATGAGCAGCCTA-3'      | <i>in situ</i> hybridization probe |

**Supplementary Table 1 –Sequence of primers used in the present study**

## SUPPLEMENTARY FIGURES

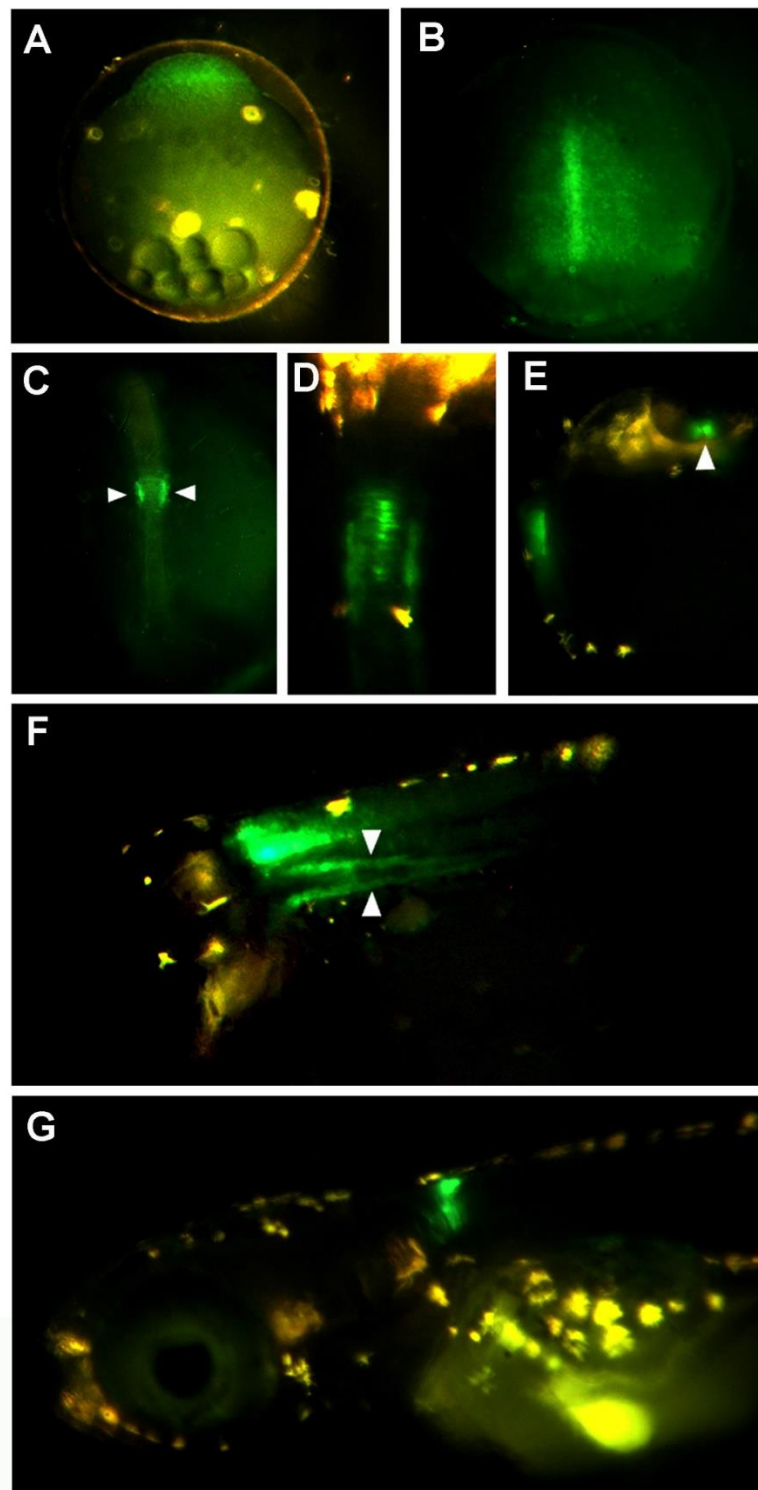

**Supplementary Figure 1. Spatial and temporal expression patterns of 12X Retinoc Acid Responsive Element (RARE) transgenic line during medaka development.** (A) Early blastula stage with ubiquitous RA-responsiveness. (B) Late gastrula stage with ubiquitous responsiveness on the embryonic shield. (C) Stage 18 with responsiveness on the lateral plate mesoderm (arrow head). (D) Stage 23 (12 somite stage) responsiveness in the somites (until 5-6), neural tube and notochord. (E) Stage 27 showing responsiveness in the retina, strongly at the ventral part (arrow head). (F) Stage 33 with pronephros responsiveness clearly recognizable (arrow heads). (G) Hatching stage, with responsiveness of the hindbrain being more prominent compared to other tissues.

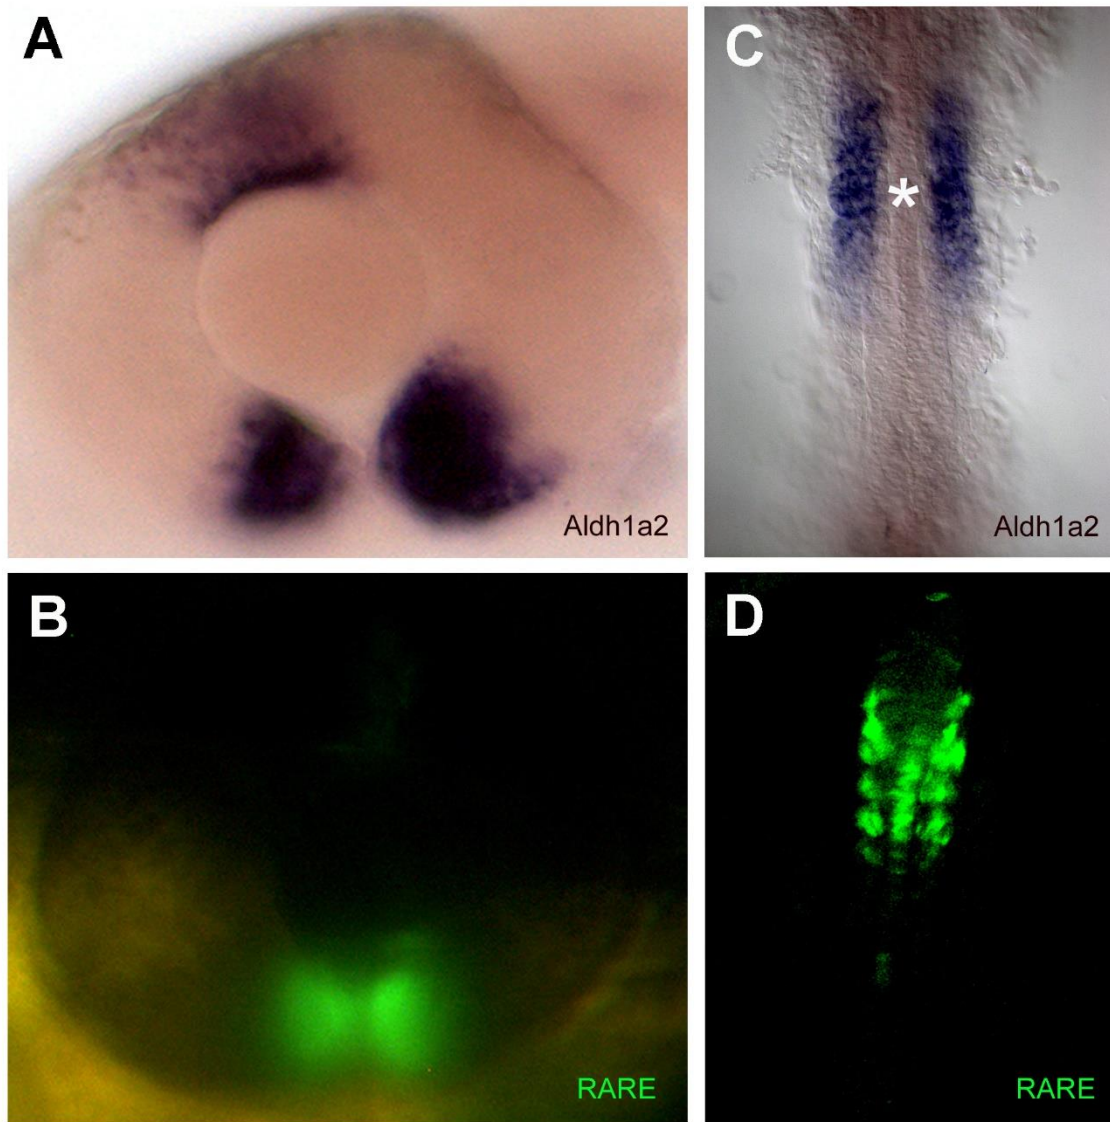

**Supplementary Figure 2. Comparison between *aldh1a2* expression and responsiveness to retinoic acid in medaka embryo.** (A) *in situ* hybridization for *aldh1a2* with ventral and dorsal expression domains in the retina. (B) RA responsiveness in the ventral retina. (C) *in situ* hybridization for *aldh1a2* showing expression in the first four somites. (D) GFP expression in the first four somites and the neural tube of a *tg(12xRARE:GFP)* embryo. The asterisk indicates the region where RA action is not restricted to its source of synthesis.

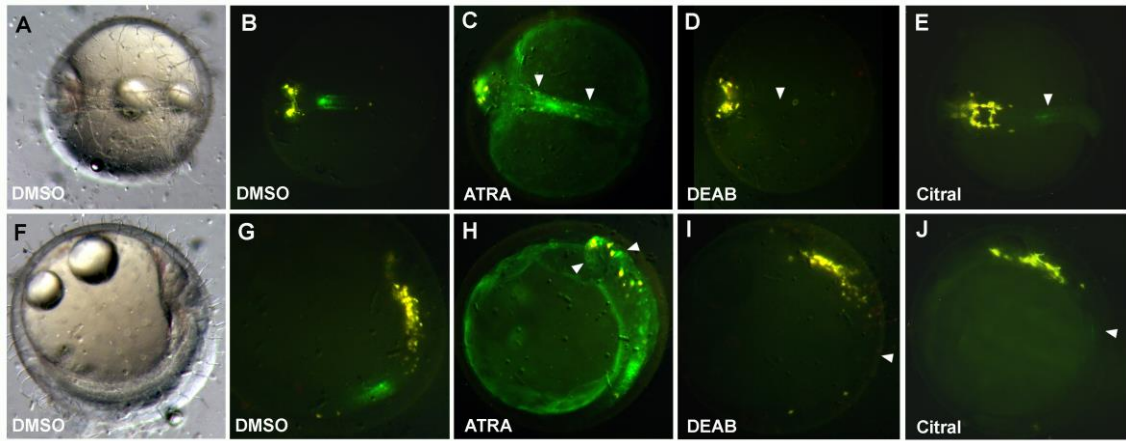

**Supplementary Figure 3. 12XRARE transgenic signal after ATRA, DEAB and Citral.** Treatment of embryos with 100 nM ATRA (C and H) starting at stage 14 induces transgene expression throughout the neural tube and neural retina by stage 23 (arrow head) compared to the DMSO-treated control (A, B, F and G). Treatment of embryos with 5  $\mu$ M DEAB (D and I) and 1  $\mu$ M Citral (E and J), both RA synthase inhibitors, at the same stage significantly reduces transgene signal in the neural tube (arrow head) compared to DMSO-treated control.

-2392 ACAGTGTGACGCTGAACCCAGATGAGGTTTGGTGGCTGTTTCTGTACCAAAGTCGATTTCACCTGTGAGATGATCAAAAACAATCTGTGCTTGACT -2293  
-2292 CCCAAAATAGCATCGTGTACCCGGCTACGGCTCCCAATTGAACCTCAGACGTTCCATTGACTTTTCTTTTTTTGACGGCTTAAGCTGAACCTGGAACCA -2193  
-2192 GACCTTGTCTGTATCAGTGGATATCACCAAACCTTAACTTAAATCTGAATCAAAACCCAGAAAACCTTTTACACGAGGAAATGAATGAAGCCCACTG -2093  
-2092 GTCCAGGTCTGTTTTTTGGTACACCTCTGACTAGGACAGGATCCACTAAAGTCTCTAATGGAAATCAATCCGCTCTTCTCTAAGTACATAAAAAGTC -1993  
-1992 CTTCCATAAGTAAATTTAAAAAAAACCTAAATTTCAAATGACTTTTATTCATAACACTGAAAGTAAAGTTCATTTAAATGCCTTTTTTCCACACCTAAGG -1893  
-1892 TCACAGGGCAAAACGAATAATGAACAAAATGTTTTATCTATAAACTTAAAGATGGAGCAGATCAGGACTCCACCCTGCAGAAACAAGATAGCCATAAACAG -1793  
-1792 ACGAGTTTCAGTTTTTATTTGAATTGTGAAAACAGATAGTGTTCGGAGATGTAGACAGGATCCATACCTGGGGGCAGACTGCTCTCTGTCCAATGG -1693  
-1692 AAGTGAACAAGCAGAGTGGGGAGGGGGTGGAGTTATGGAGATAGCCAGACGAGATCAGAGCCGAGGCTGTGGACGGTCTTGAAGTAAAAACACGCTCT -1593  
-1592 GTGACATTTGAACGGAGGTGATGCTAAAACCTGGACAGGATAAAGCGCTTCACTCTTCGTTTACTACTTGGTGACGGTGGAGGCTGGCTGCCAGTTCCAC -1493  
-1492 CTACGGTCCCTCTGACCAACACCAGGATCATTTCATGCACAATCATGATGGTAGGACAGTAGCGTTAAAGGCTTGGCCAAAGGGCCCTCACTGGGTGTTACC -1393  
-1392 TGAATGGTGTCTGTCTACCAATTCATTTCTTGTCTTTCATTCGCCGCCACGAAATGAACCCCTGCATGTCAGTCTTCCCTTACCAACCCAGGCTACC -1293  
-1292 CAGCCGCTCATGTGTAGTGTGACATGTATAGTAGGACAGACTCTGAACACCAGAGCTGACTAAGAGAGGATGGACAGATTTGAACCTGCTGCTGAAAG -1193  
-1192 CAGATTAGGCATGGATGGAGTCAAAGGCCCTCGCTCCGACCACGCAGGATGAACCCCGACGGCGAGGAGGAGGTCAGTAGTTTGGATTGAAGCAGTCAG -1093  
-1092 TCCTGTGAAAGGGAGAGGAGGAAACCCCGCTTATTCAAATGATTTTCATAAAAGACATTTTCAATGGAAAATGTTGAGATCATTTGAACCCAGCAGCA -993  
-992 GTTTTAGAAATGAGAGAGGAGAGAGTCTGTGAGGAGAGATGCCAAAGAGGAGGTGGGGCTTTGAGAGCAGCAGAGGGAGGGAGATCCTCTGTATGGTTCC -893  
-892 TGTGTGATGAGACATGCAGTCACTTTAGTGACAAATGAGAAGAAAATAAAGGTTTAAAAAATAAAGCGTGTAAAAGCACAGCCAGCCGCTGTAACCTCAGAC -793  
-792 TGCTGGCTCCCGAGTCCCGCGCTGCGCGCCACCCACATACCTGATTGAATGACGACAGCGTCAGGGATCCAAACACAACAGATCCACGCGCAAATG -693  
-692 GGGATGTCGTGGTGCAGTGTGCCCCCCCCCTGTTGGGTGCAGTGGCGTGGCCCGGGGATAACCTGCGTGCCTTTCGCGCGCGCCCTTGCAT -593  
-592 GCCTCATCTGACCCAAAGTTTGAACCCGGACAGAGATATCATTATAGCCCGCGCGGCTATGTGGAGGGTAAAGGGGTTCTTGGGGGCCCGTGTCCG -493  
-492 GGCGTCCCGGGCCCGCGTGCCTGCAATGTTGCGTTCAGGGGCCCCGAAGAGCCTCTTACCATTAGTAAAAGCCCGCTAAGCCCGTTTGTCTG -393  
-392 TGAATGACAGCCGTCGCCCTGCAGGCATTTGTGCTGTTCCCTAAGTGGCTCTTGGCGCGTTCATGAGGGTAAACAAGGCGCTCGCGCCCGCAGTCATT -293  
-292 GTCTTCGGGGAGAAATTTCTGGGGACTTTCAGCGGATGTCTGCGTGCACAGGAGGTTGAGATTAAGATGCACACTTGAACAAATTTATGAGGCAA -193  
-143 -132  
-192 ATCAGCCAATGCAGGCCAGAGCGGGGCGAGCAACACCCCGCAATAGGCTGAACCTCTCCGGAACCTGACTCATCTGAGGGAGGTGAGGGCTGCGCGCGC -82 -93  
-82 -1  
-92 TCCTGCAACCTATAAAGGGTCCGCGGGGAGCGCGGGGACCCAGTCTGTGGGAGACGTTCACTGTAGCCGACGCGCCCGCACACCGCGACATG

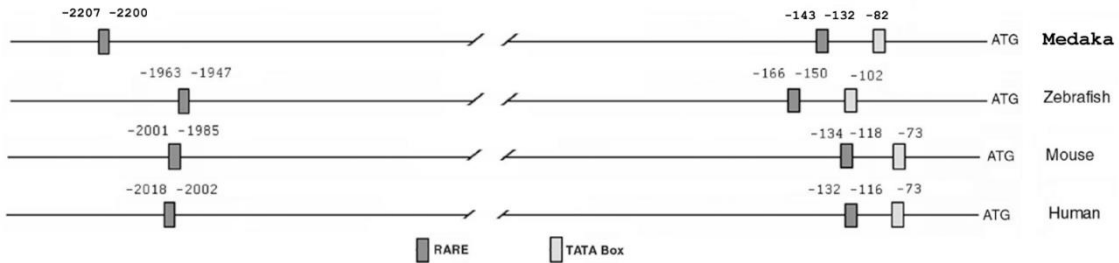

**Supplementary Figure 4. Sequence of medaka promoter region of *cyp26a1*.** RA responsive elements (RARE) in the *cyp26a1* medaka promoter region. Those elements are conserved in the promoter of this gene in different species. Promoters sequences were retrieved from GenBank (<http://www.ncbi.nlm.nih.gov>). Scheme adapted from ref.<sup>32</sup>.
